# Supplementary material for: Does Strength-Promoting Exercise Confer Unique Health Benefits? A Pooled Analysis of Data on 11 Population Cohorts With All-Cause, Cancer, and Cardiovascular Mortality Endpoints
Source: Oxford University Press journal article supplement (doi:10.1093/aje/kwx345), 2017-10-21

## Supplementary Online Materials

### LIST (In order of appearance in manuscript text):

**Web Appendix 1:** The Questions On Sports And Exercises That List The Two Strength Promoting Exercise Exposures Used In This Study

**Web Table 1:** Age And Sex-Specific Percentages Of Total Gym-Based Activity That Was Reported To Be “Strength Work Out At A Gym Using Machines Or Free Weights”

**Web Table 2:** Sex-Specific Median Values Of Weekly Volume (Minutes) Of Strength-Promoting Exercise

**Web Table 3:** Description And Justification/Purpose Of Sensitivity Analyses Undertaken

**Web Table 4:** Hazard Ratios Describing The Associations Between Strength-Promoting Exercise And Cardiovascular Disease Mortality. Adults Aged 30 Years And Over With No Cardiovascular Disease At Baseline Who Survived The First 24 Months Of Follow Up (N=73,937).

**Web Figure 1A to Web Figure 1C:** Hazard Ratios Describing The Association Of Adherence To The Strength Promoting Guideline, Adherence To The Alternative Definition Of The Aerobic Physical Activity Guideline, With Mortality.

**Web Figure 2A to Web Figure 2C:** Hazard Ratios Describing The Associations Of Adherence To The Aerobic Physical Activity Guideline And The Alternative Definition Of The Strength Promoting Guidelines, With Mortality.

**Web Table 5:** Hazard Ratios Describing The Associations Between Strength-Promoting Exercise And All-Cause, Cardiovascular Disease, And Cancer Mortality. Non-Smokers Aged 30 Years Who Survived The First 24 Months Of Follow-Up

**Web Appendix 1:** The Questions on Sports and Exercises That List the Two Strength Promoting Exercise Exposures Used in This Study (Items 3 and 10 in the list below)

**ASK ALL AGE 16+**

**ActPhy**

SHOW CARD N

Can you tell me if you have done any activities on this card during the last 4 weeks, that is since *(date of interview – 4 weeks)*? Please include teaching, coaching, training and practice sessions.

- 1 Yes
- 2 No

**IF ActPhy = Yes THEN**

**WhtAct**

SHOW CARD N

Which have you done in the last four weeks?

PROBE: Any others?

CODE ALL THAT APPLY.

- 1 Swimming
- 2 Cycling
- 3 Workout at a gym/Exercise bike/Weight training
- 4 Aerobics/Keep fit/Gymnastics/ Dance for fitness
- 5 Any other type of dancing
- 6 Running/Jogging
- 7 Football/Rugby
- 8 Badminton/tennis
- 9 Squash
- 10 Exercises (e.g. press-up, sit-ups).

**Web Table 1: Age and Sex-Specific Percentages<sup>a</sup> of Total Gym-Based Activity That was Reported to be “Strength Work Out at a Gym Using Machines or Free Weights”**

|                  | Males (% of total) | Females (% of total) |
|------------------|--------------------|----------------------|
| <b>Age group</b> |                    |                      |
| <b>30-35</b>     | 86                 | 52                   |
| <b>36-44</b>     | 79                 | 58                   |
| <b>45-54</b>     | 69                 | 60                   |
| <b>55-64</b>     | 55                 | 53                   |
| <b>64-74</b>     | 53                 | 44                   |
| <b>75+</b>       | 61                 | 57                   |

<sup>a</sup>Calculated using in the pooled samples of participants aged  $\geq 30$  years in the 2008 (n=12,360) and 2012 (n=6883) Health Surveys for England.

**Web Table 2: Sex-Specific Median Values of Weekly Volume (Minutes) of Strength-Promoting Exercise<sup>b</sup>**

|                                       | Minutes/Week |
|---------------------------------------|--------------|
| <b>Own bodyweight SPE<sup>a</sup></b> |              |
| <b>Women</b>                          | 52.5         |
| <b>Men</b>                            | 50.0         |
| <b>Gym-based SPE<sup>a</sup></b>      |              |
| <b>Women</b>                          | 39.0         |
| <b>Men</b>                            | 59.5         |
| <b>All Strength Exercise</b>          |              |
| <b>Women</b>                          | 66.0         |
| <b>Men</b>                            | 52.5         |

<sup>a</sup>SPE: strength promoting exercise; <sup>b</sup> Calculated using data from participators only, i.e. excluding zeros

**Web Table 3: Description and justification/purpose of sensitivity analyses undertaken**

| <b>Description</b>                                                                                                                                                     | <b>Purpose/Justification</b>                                                                                                                                    |
|------------------------------------------------------------------------------------------------------------------------------------------------------------------------|-----------------------------------------------------------------------------------------------------------------------------------------------------------------|
| We repeated all main Cox analyses with additional adjustment for fruit and vegetable consumption (27) in a sub-sample.                                                 | To examined the role of dietary confounding                                                                                                                     |
| We repeated various Cox models with adherence to the SPE guidelines calculated using own bodyweight exercise only.                                                     | To minimize the possibility that the associations between SPE and mortality are not due to the aerobic exercise element included in the gym-based SPE question. |
| We included an non-strength promoting physical activity*SPE term in the fully adjusted Cox models and we performed stratified Cox analyses by physical activity level. | To examined whether total activity is an effect modifier of the association between SPE and the mortality outcomes.                                             |
| We carried out a sensitivity analysis restricted to non-smokers.                                                                                                       | Smoking is a causal risk factor for all three-study outcomes and is strongly associated to participation of SPE.                                                |

**Web Table 4: Hazard Ratios Describing the Associations Between Strength-Promoting Exercise and Cardiovascular Disease Mortality. Adults Aged 30 Years and Over With No Cardiovascular Disease<sup>a</sup> at Baseline who Survived the First 24 Months of Follow-Up (n=73,937).**

|                                    |            | Model 1 <sup>c</sup> |            | Model 2 <sup>d</sup> |            |
|------------------------------------|------------|----------------------|------------|----------------------|------------|
|                                    |            | HR                   | 95% CIs    | HR                   | 95% CIs    |
| <b>Own bodyweight exercises</b>    |            |                      |            |                      |            |
| <i>Overall participation</i>       |            |                      |            |                      |            |
| None                               | 1648/66756 | 1.00                 |            | 1.00                 |            |
| Any                                | 75/7181    | 0.72                 | 0.57, 0.91 | 0.86                 | 0.68, 1.09 |
| <i>P for trend</i>                 |            | 0.007                |            | 0.223                |            |
| <i>Weekly volume<sup>b</sup></i>   |            |                      |            |                      |            |
| None                               | 1648/66756 | 1.00                 |            | 1.00                 |            |
| Low                                | 29/3589    | 0.68                 | 0.47, 0.99 | 0.80                 | 0.56, 1.16 |
| High                               | 46/3592    | 0.75                 | 0.56, 1.01 | 0.91                 | 0.67, 1.22 |
| <i>P for trend</i>                 |            | 0.181                |            | 0.724                |            |
| <b>Gym-based</b>                   |            |                      |            |                      |            |
| <i>Overall participation</i>       |            |                      |            |                      |            |
| None                               | 1690/67164 | 1.00                 |            | 1.00                 |            |
| Any                                | 33/6773    | 0.72                 | 0.51, 1.02 | 0.91                 | 0.64, 1.29 |
| <i>P for trend</i>                 |            | 0.068                |            | 0.606                |            |
| <i>Weekly volume<sup>b e</sup></i> |            |                      |            |                      |            |
| None                               | 1690/67164 | 1.00                 |            | 1.00                 |            |
| Low                                | 22/3334    | 0.82                 | 0.54, 1.25 | .01                  | 0.66, 1.54 |
| High                               | 11/3439    | 0.58                 | 0.32, 1.06 | 0.76                 | 0.42, 1.38 |
| <i>P for trend</i>                 |            | 0.105                |            | 0.376                |            |
| <b>All Strength Exercise</b>       |            |                      |            |                      |            |
| <i>Overall participation</i>       |            |                      |            |                      |            |
| None                               | 1623/62253 | 1.00                 |            | 1.00                 |            |
| Any                                | 100/11684  | 0.73                 | 0.59, 0.89 | 0.88                 | 0.71, 1.08 |
| <i>P for trend</i>                 |            | 0.002                |            | 0.208                |            |

|                                                                                                                                                                                                                                                                                                                                                                                                                                                                                                                                                                                                                                                                                                                                                                                                                                                                                                                                                                                                                              |             |              |            |              |            |
|------------------------------------------------------------------------------------------------------------------------------------------------------------------------------------------------------------------------------------------------------------------------------------------------------------------------------------------------------------------------------------------------------------------------------------------------------------------------------------------------------------------------------------------------------------------------------------------------------------------------------------------------------------------------------------------------------------------------------------------------------------------------------------------------------------------------------------------------------------------------------------------------------------------------------------------------------------------------------------------------------------------------------|-------------|--------------|------------|--------------|------------|
| <i>Weekly volume<sup>c e</sup></i>                                                                                                                                                                                                                                                                                                                                                                                                                                                                                                                                                                                                                                                                                                                                                                                                                                                                                                                                                                                           |             |              |            |              |            |
| None                                                                                                                                                                                                                                                                                                                                                                                                                                                                                                                                                                                                                                                                                                                                                                                                                                                                                                                                                                                                                         | 1623/62253  | 1.00         |            | 1.00         |            |
| Low                                                                                                                                                                                                                                                                                                                                                                                                                                                                                                                                                                                                                                                                                                                                                                                                                                                                                                                                                                                                                          | 49/5794     | 0.75         | 0.56, 1.00 | 0.89         | 0.67, 1.19 |
| High                                                                                                                                                                                                                                                                                                                                                                                                                                                                                                                                                                                                                                                                                                                                                                                                                                                                                                                                                                                                                         | 51/5890     | 0.71         | 0.53, 0.93 | 0.86         | 0.65, 1.14 |
| <i>P for trend</i>                                                                                                                                                                                                                                                                                                                                                                                                                                                                                                                                                                                                                                                                                                                                                                                                                                                                                                                                                                                                           |             | <i>0.044</i> |            | <i>0.364</i> |            |
| <i>Adherence to strength exercise guideline<sup>f</sup></i>                                                                                                                                                                                                                                                                                                                                                                                                                                                                                                                                                                                                                                                                                                                                                                                                                                                                                                                                                                  |             |              |            |              |            |
| Do not meet the guideline                                                                                                                                                                                                                                                                                                                                                                                                                                                                                                                                                                                                                                                                                                                                                                                                                                                                                                                                                                                                    | 1651/67,059 | 1.00         |            | 1.00         |            |
| Meet the guideline                                                                                                                                                                                                                                                                                                                                                                                                                                                                                                                                                                                                                                                                                                                                                                                                                                                                                                                                                                                                           | 72/6878     | 0.77         | 0.60, 0.97 | 0.92         | 0.72, 1.12 |
| <i>P for trend</i>                                                                                                                                                                                                                                                                                                                                                                                                                                                                                                                                                                                                                                                                                                                                                                                                                                                                                                                                                                                                           |             | <i>0.027</i> |            | <i>0.469</i> |            |
| <p><sup>a</sup> Prevalent cardiovascular disease was defined as doctor-diagnosed or self-reported ischemic heart disease, angina, or stroke; <sup>b</sup>Groups were defined using the sex-specific medians of the corresponding variable (see <i>Web Table 2</i>) <sup>c</sup>Model adjusted for age and sex <sup>d</sup>Model also adjusted for long-standing illness, alcohol drinking frequency, psychological distress, body mass index, smoking status, education level, and weekly physical activity volume excluding the volume of strength-promoting activity that is the main exposure in the corresponding model; <sup>e</sup>Gym-based exercise weekly volumes were weighted using age (10 year bands) and sex-specific proportions of total gym-based activity that was “Strength work out at a gym using machines or free weights” derived from the Health Survey for England 2008 and 2012 datasets (see <i>Web Table 1</i>); <sup>f</sup>Defined as two sessions of strength promoting exercise per week</p> |             |              |            |              |            |

**Web Table 5: Hazard Ratios Describing the Associations<sup>a</sup> Associations Between Strength-Promoting Exercise and All-Cause, Cardiovascular Disease related, and Cancer Mortality. *Non-Smokers Aged 30 Years who Survived the First 24 Months of Follow-Up.***

|                                                                                                                                                                                                                                                                                                                                                                                   | All-Cause Mortality |        |            | CVD Mortality |       |            | Cancer Mortality |        |            |
|-----------------------------------------------------------------------------------------------------------------------------------------------------------------------------------------------------------------------------------------------------------------------------------------------------------------------------------------------------------------------------------|---------------------|--------|------------|---------------|-------|------------|------------------|--------|------------|
|                                                                                                                                                                                                                                                                                                                                                                                   | Deaths/n            | HR     | 95% CIs    | Deaths/n      | HR    | 95% CIs    | Deaths/n         | HR     | 95% CIs    |
| Own bodyweight exercises                                                                                                                                                                                                                                                                                                                                                          |                     |        |            |               |       |            |                  |        |            |
| <i>Overall participation</i>                                                                                                                                                                                                                                                                                                                                                      |                     |        |            |               |       |            |                  |        |            |
| None                                                                                                                                                                                                                                                                                                                                                                              | 3892/48,599         | 1.00   |            | 1205/49,691   | 1.00  |            | 1364/52,102      | 1.00   |            |
| Any                                                                                                                                                                                                                                                                                                                                                                               | 189/5686            | 0.77   | 0.66, 0.89 | 58/5770       | 0.84  | 0.64, 1.10 | 64/5876          | 0.66   | 0.51, 0.85 |
| <i>P for trend</i>                                                                                                                                                                                                                                                                                                                                                                |                     | <0.001 |            |               | 0.199 |            |                  | 0.001  |            |
| Gym-based                                                                                                                                                                                                                                                                                                                                                                         |                     |        |            |               |       |            |                  |        |            |
| <i>Overall participation</i>                                                                                                                                                                                                                                                                                                                                                      |                     |        |            |               |       |            |                  |        |            |
| None                                                                                                                                                                                                                                                                                                                                                                              | 3996/48,655         | 1.00   |            | 1237/49,756   | 1.00  |            | 1394/52,214      | 1.00   |            |
| Any                                                                                                                                                                                                                                                                                                                                                                               | 85/5630             | 0.81   | 0.65, 1.00 | 26/5705       | 0.97  | 0.65, 1.40 | 34/5764          | 0.62   | 0.44, 0.88 |
| <i>P for trend</i>                                                                                                                                                                                                                                                                                                                                                                |                     | 0.062  |            |               | 0.877 |            |                  | 0.007  |            |
| All Strength Exercise                                                                                                                                                                                                                                                                                                                                                             |                     |        |            |               |       |            |                  |        |            |
| <i>Overall participation</i>                                                                                                                                                                                                                                                                                                                                                      |                     |        |            |               |       |            |                  |        |            |
| None                                                                                                                                                                                                                                                                                                                                                                              | 3824/44,850         | 1.00   |            | 1185/45,888   | 1.00  |            | 1335/48,240      | 1.00   |            |
| Any                                                                                                                                                                                                                                                                                                                                                                               | 255/9404            | 0.78   | 0.69, 0.89 | 78/9542       | 0.87  | 0.69, 1.1  | 92/9706          | 0.67   | 0.54, 0.83 |
| <i>P for trend</i>                                                                                                                                                                                                                                                                                                                                                                |                     | <0.001 |            |               | 0.238 |            |                  | <0.001 |            |
| Strength Exercise Guideline <sup>b</sup>                                                                                                                                                                                                                                                                                                                                          |                     |        |            |               |       |            |                  |        |            |
| Do not meet the guideline                                                                                                                                                                                                                                                                                                                                                         | 3908/48,743         | 1.00   |            | 1210/49,833   | 1.00  |            | 1366/52,262      | 1.00   |            |
| Meet the guideline                                                                                                                                                                                                                                                                                                                                                                | 173/5542            | 0.77   | 0.66, 0.89 | 53/5628       | 0.84  | 0.63, 1.10 | 62/5716          | 0.69   | 0.53, 0.89 |
| <i>P for trend</i>                                                                                                                                                                                                                                                                                                                                                                |                     | 0.001  |            |               | 0.205 |            |                  | 0.005  |            |
| <sup>a</sup> Adjusted for age, sex, long-standing illness, alcohol drinking frequency, psychological distress, body mass index, smoking status, education level, and weekly physical activity volume excluding the strength-promoting activity that is the main exposure in the corresponding model; <sup>b</sup> Defined as two sessions of strength promoting exercise per week |                     |        |            |               |       |            |                  |        |            |

**Web Figure 1A to Web Figure 1C:** Hazard Ratios Describing The Association Of Adherence To The Strength Promoting Guideline, Adherence To The Alternative Definition Of The Aerobic Physical Activity Guideline, With Mortality. *Analyses were adjusted for age, BMI, educational attainment, presence of longstanding illness, weekly frequency of alcohol consumption, smoking habits, psychological distress/depression, and total volume of physical activity. Adherence to the physical activity guidelines reflects average weekly MET-hrs from domestic activity, walking of any intensity, and recreational physical activity (including sports and exercises). Achieving at least 7.5 MET-hrs on non-strength promoting exercise denoted adherence to the aerobic guideline. Sample sizes for all-cause mortality (cases/n): Neither (2971/24,625), Both (168/5800), Strength Only (59/978), Aerobic Only (2565/41,056); CVD mortality: Neither (919/25,270), Both (50/5884), Strength Only (22/994), Aerobic Only (732/41,789); Cancer mortality: Neither (946/27,510), Both (65/5,934), Strength Only (12/1,031), Aerobic Only (1,066/42,720).*



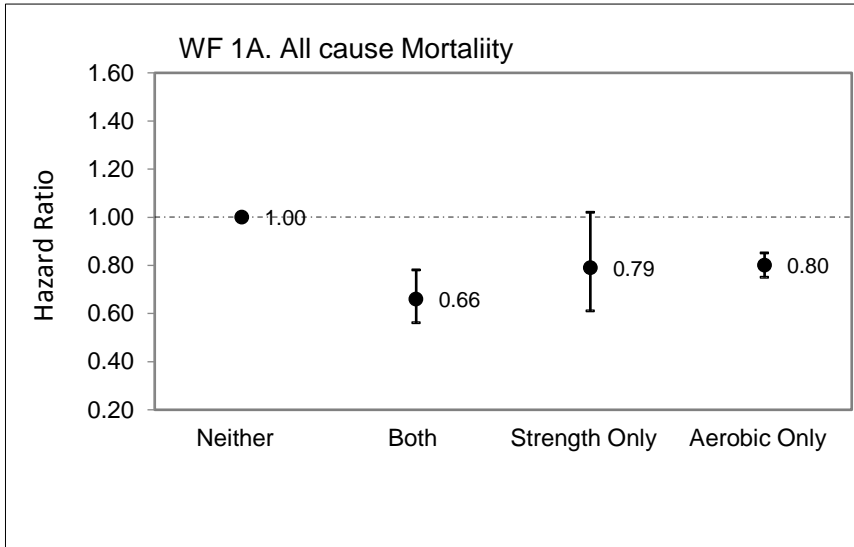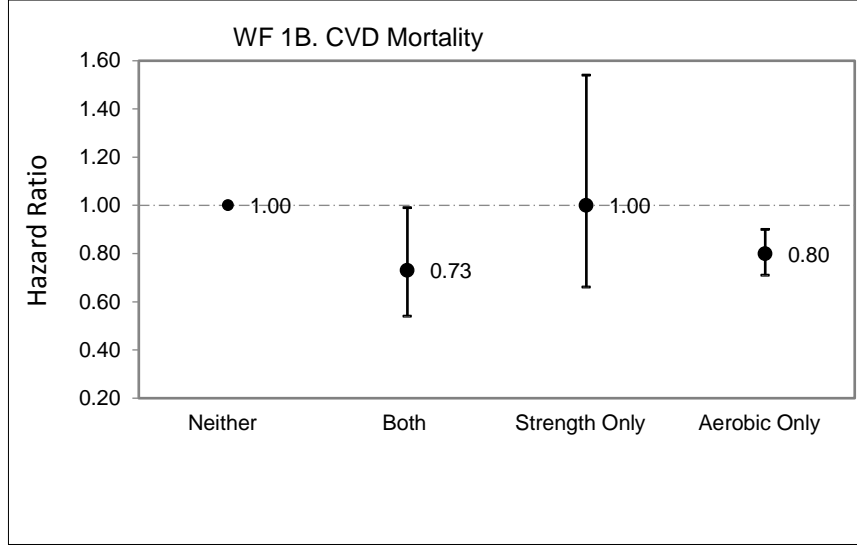

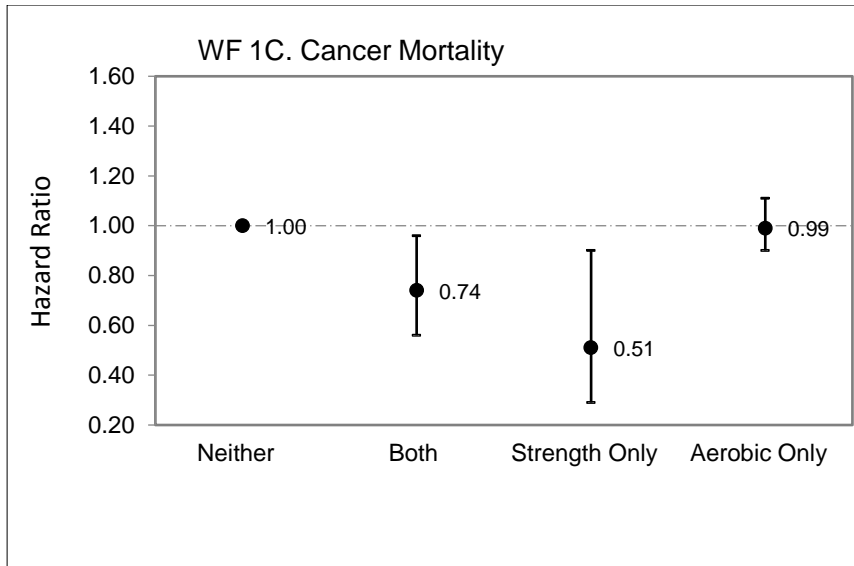

**Web Figure 2A to Web Figure 2C Hazard Ratios** Describing The Associations Of Adherence To The Aerobic Physical Activity Guideline And The Alternative Definition Of The Strength Promoting Guidelines, With Mortality. *Analyses adjusted for age, BMI, educational attainment, presence of longstanding illness, weekly frequency of alcohol consumption, smoking habits, psychological distress/depression, and total volume of physical activity. Adherence to the physical activity guideline reflects moderate to vigorous physical activity only: at least 150 minutes/week of moderate intensity or 75 minutes/week of vigorous intensity or equivalent combinations of moderate and vigorous non-strength promoting / non-domestic physical activity. Adherence to the strength promoting exercise guidelines refers to reporting at least two session of own bodyweight strength promoting exercise per week. Sample sizes for all-cause mortality (cases/n): Neither (4172/ 39,228), Both (77/2685),Strength Only (107/1504), Aerobic Only (1407/29,042); CVD mortality: Neither (1286/40,161), Both (21/2717), Strength Only (36/1538), Aerobic Only (380/29,521); Cancer mortality: Neither (1416/42,948), Both (30/2727), Strength Only (29/1593), Aerobic Only (614/29,927).*

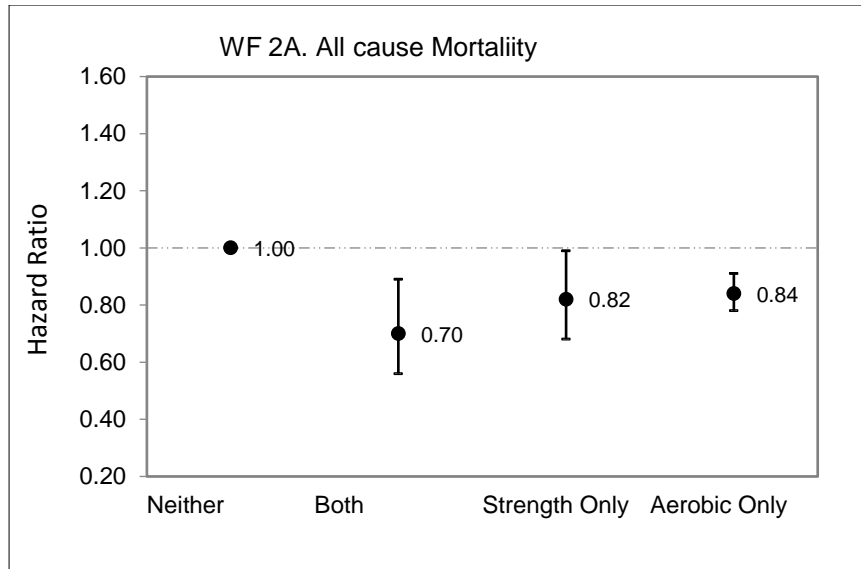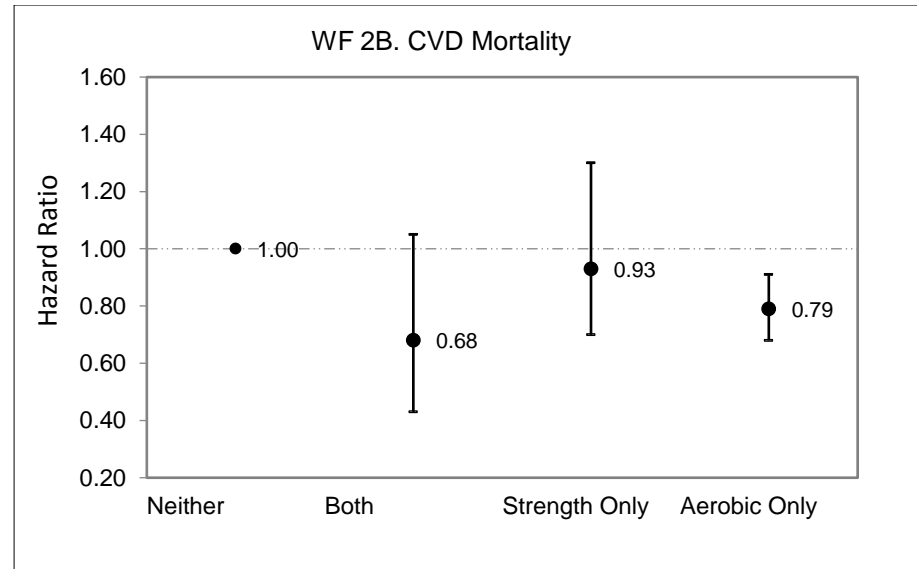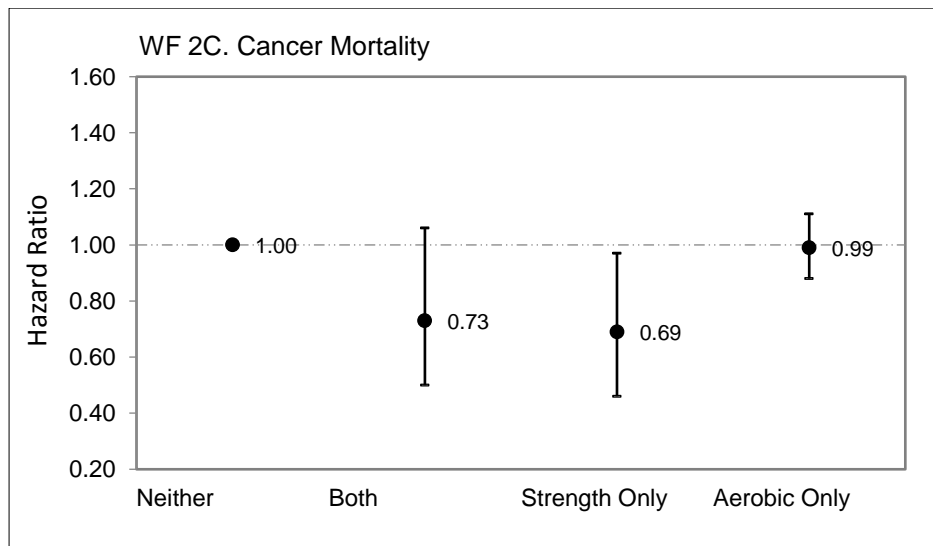

Supplement: mmd12_strengthmort_supplmnt_rev2_vfinal6.pdf [file mmd12_strengthmort_supplmnt_rev2_vfinal6.pdf]
